# Supplementary material for: Natural Cyanobacterial Polymer-Based Coating as a Preventive Strategy to Avoid Catheter-Associated Urinary Tract Infections
Source: PubMed Central journal article supplement (PMC7344411; doi:10.3390/md18060279), 2020-05-26
Supplement: marinedrugs-18-00279-s001.pdf [file marinedrugs-18-00279-s001.pdf]

## Supplementary material

### Natural cyanobacterial polymer-based coating as a preventive strategy to avoid catheter-associated urinary tract infections

Bruna Costa<sup>1,2</sup>, Rita Mota<sup>1,3</sup>, Paula Tamagnini<sup>1,3,4</sup>, M. Cristina L. Martins<sup>1, 2,5</sup>, Fabíola Costa<sup>1,2\*</sup>

<sup>1</sup>i3S – Instituto de Investigação e Inovação em Saúde, Universidade do Porto, Rua Alfredo Allen, 208, 4200-135 Porto, Portugal; [bruna.costa@i3s.up.pt](mailto:bruna.costa@i3s.up.pt) (B.C.); [rita.mota@ibmc.up.pt](mailto:rita.mota@ibmc.up.pt) (R.M.); [pmtamagn@ibmc.up.pt](mailto:pmtamagn@ibmc.up.pt) (P.T.); [cmartins@ineb.up.pt](mailto:cmartins@ineb.up.pt) (M.C.L.M.); [fabiolamoutinho@ineb.up.pt](mailto:fabiolamoutinho@ineb.up.pt) (F.C.)

<sup>2</sup>INEB – Instituto de Engenharia Biomédica, Universidade do Porto, Rua Alfredo Allen, 208, 4200-135 Porto, Portugal.

<sup>3</sup>IBMC – Instituto de Biologia Molecular e Celular, Universidade do Porto, Rua Alfredo Allen, 208, 4200-135 Porto, Portugal.

<sup>4</sup>Faculdade de Ciências, Departamento de Biologia, Universidade do Porto, Rua do Campo Alegre, Edifício FC4, 4169-007 Porto, Portugal.

<sup>5</sup>ICBAS – Instituto de Ciências Biomédicas Abel Salazar, Universidade do Porto, Rua Jorge de Viterbo Ferreira 228, 4050-313 Porto, Portugal.

**Table S1:** Assessment of metal contaminants by Inductively Coupled Plasma - Atomic Emission Spectroscopy (ICP-AES).

| Sample                       | As (193.695 nm) | Cd (226.502 nm) | Hg (194.164 nm) | Pb (220.353 nm) |
|------------------------------|-----------------|-----------------|-----------------|-----------------|
| CyanoCoating<br>(sample #1)  | Nd              | Nd              | Nd              | Nd              |
| CyanoCoating<br>(sample #2)  | Nd              | Nd              | Nd              | Nd              |
| CyanoCoating<br>(sample #3)  | Nd              | Nd              | Nd              | Nd              |
| Limit of detection<br>(µg/L) | 5               | 1               | 1               | 10              |

**Nd: non-detected**

**Table S2:** Composition of artificial urine medium according to Brooks et al. [32].

| <b>Reagents</b>                 | <b>Amount g/L</b> |
|---------------------------------|-------------------|
| Iron II sulphate heptahydrate   | 0.0012            |
| Yeast extract                   | 0.005             |
| Uric acid                       | 0.07              |
| Lactic acid                     | 0.1               |
| Calcium chloride dihydrate      | 0.37              |
| Citric acid                     | 0.42              |
| Magnesium sulphate heptahydrate | 0.49              |
| Creatinine                      | 0.87              |
| Potassium dihydrogen phosphate  | 0.95              |
| Peptone L37                     | 1.0               |
| Di-potassium hydrogen phosphate | 1.2               |
| Ammonium chloride               | 1.3               |
| Sodium bicarbonate              | 2.1               |
| Sodium sulphate decahydrate     | 3.2               |
| Sodium chloride                 | 5.2               |
| Urea                            | 10.0              |

**Table S3:** Composition of supplemented artificial urine medium according to Cox et al. [26].

| <b>Reagents</b>                     | <b>Amount g/L</b> |
|-------------------------------------|-------------------|
| Urease                              | 1.25              |
| Magnesium chloride hexahydrate      | 3.0               |
| Bovine albumin                      | 5.32              |
| Potassium dihydrogen orthophosphate | 7.6               |
| Urea                                | 16.0              |
| Calcium chloride hexahydrate        | 20.0              |

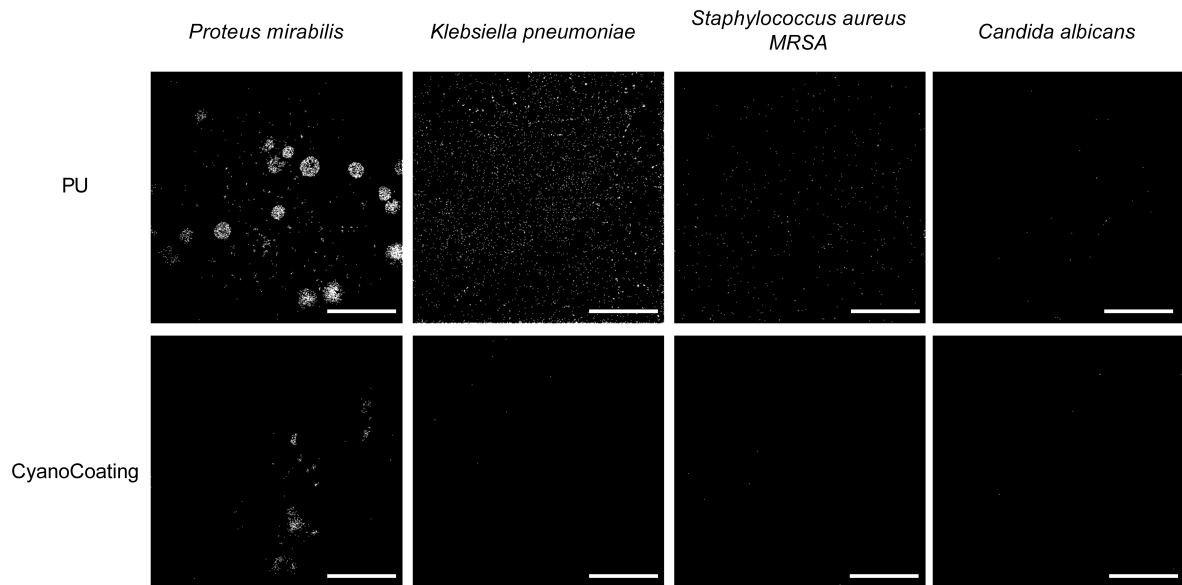

**Figure S1:** Micrographs of *Proteus mirabilis*, *Klebsiella pneumoniae*, *Staphylococcus aureus* MRSA and *Candida albicans* cells adhered to polyurethane (PU) and CyanoCoating after 24 h incubation at 37 °C and stained with Draq5 and propidium iodide (PI) (scale bars—60 μm).

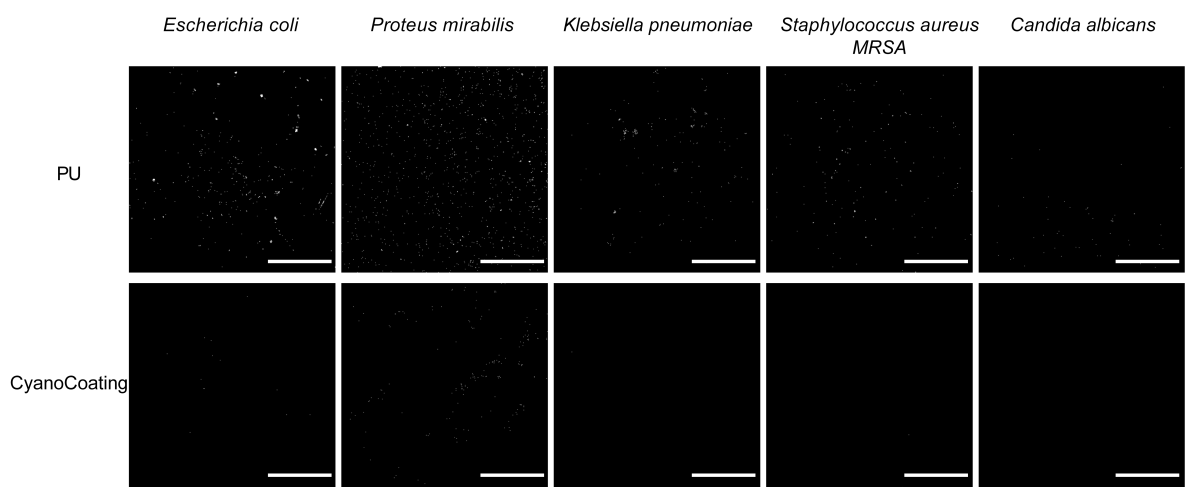

**Figure S2:** Micrographs of *Escherichia coli*, *Proteus mirabilis*, *Klebsiella pneumoniae*, *Staphylococcus aureus* MRSA and *Candida albicans* cells adhered to polyurethane (PU) and CyanoCoating after 24 h incubation at 37 °C, in the presence of artificial urine medium (AUM), and stained with Draq5 and propidium iodide (PI) (scale bars—60 μm).
